# Supplementary material
Source: PubMed Central journal article supplement (PMC4187842)
Supplement: IAI.02141-14_zii999090850so2.pdf [file IAI.02141-14_zii999090850so2.pdf]

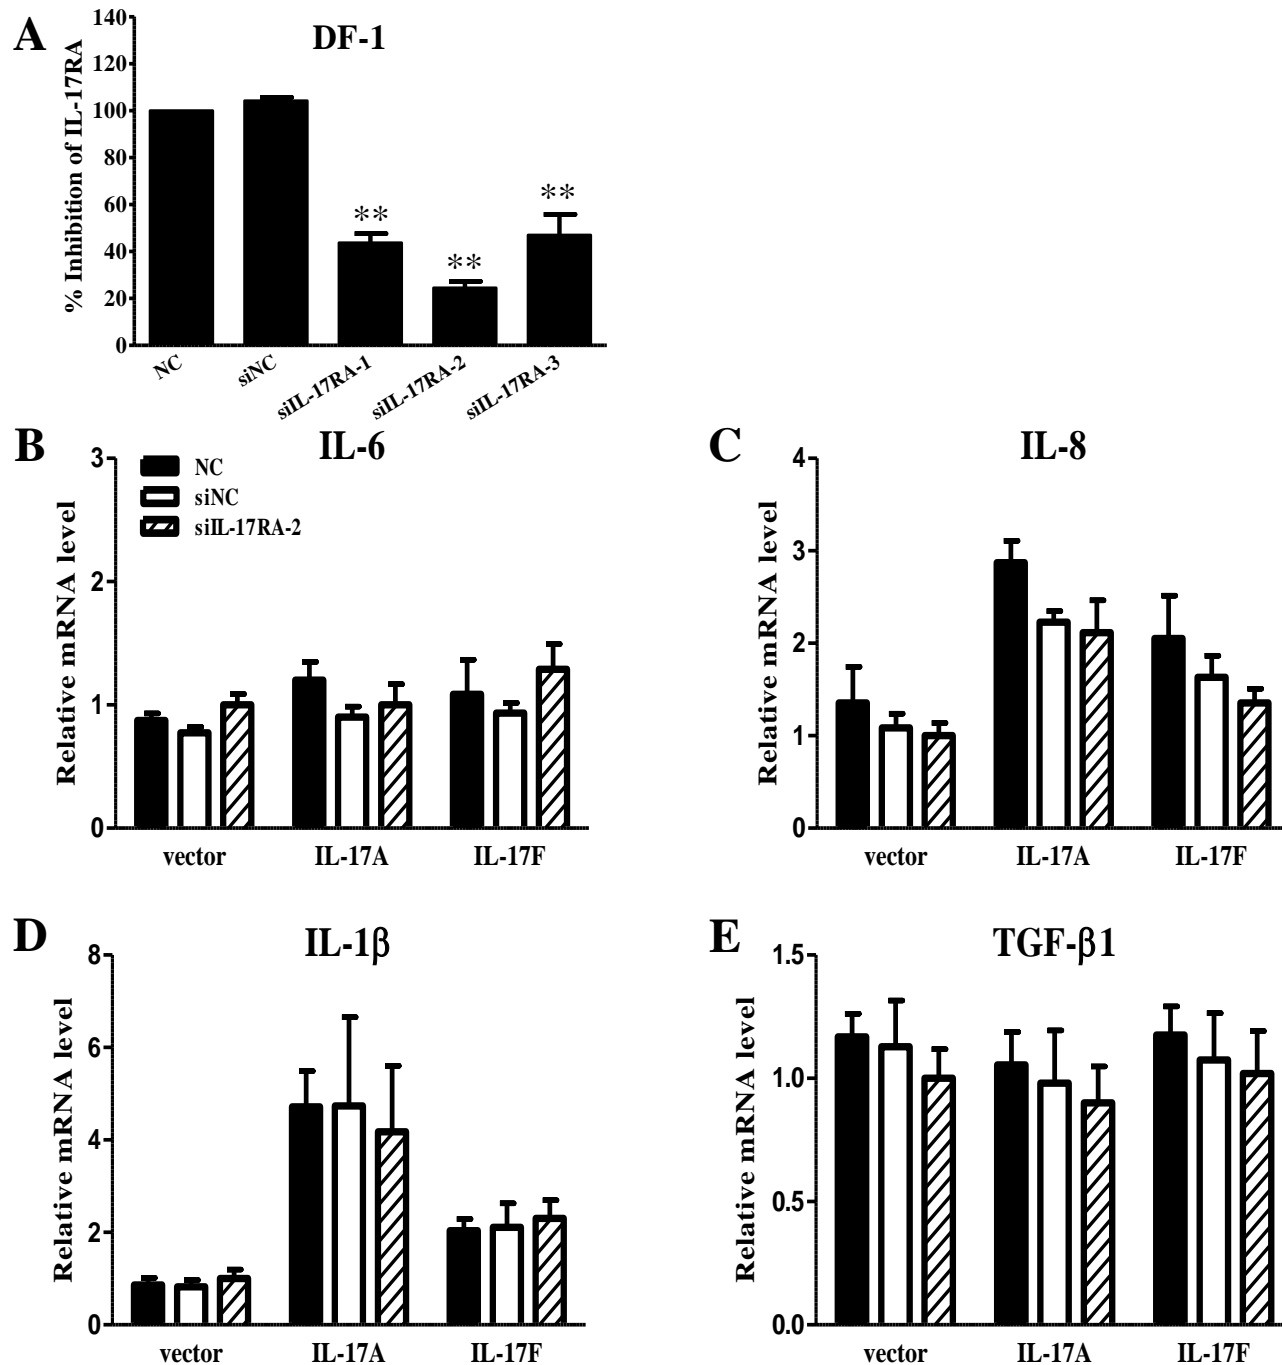

Figure S2. Inhibition of cytokine production by chIL-17RA-specific siRNA in DF-1 cells. (A) Inhibition of chIL-17RA mRNA expression by chIL-17RA-specific siRNA (siIL-17RA) in DF-1 cells. DF-1 cells were transfected with three siIL-17RA or siNC for 24 h and subjected to quantitative real-time PCR analysis. \*\*  $P < 0.01$  was considered significant compared to the nonsense siRNA (siNC) used as a negative control. (B-E) After chIL-17RA inhibition by siIL-17RA-2 or siNC, DF-1 cells were stimulated with supernatants of COS-7 cells transfected with vector only, chIL-17A, or chIL-17F plasmid. To measure biological activity of chIL-17RA, proinflammatory cytokines, IL-6 (B), IL-8 (C), IL-1 $\beta$  (D), and TGF- $\beta$ 1 (E) were analyzed by quantitative real-time PCR. NC is non-treated DF-1 cells. Gene expression levels were normalized with  $\beta$ -actin and calibrated with siIL-17RA-2 in vector group. All data represent the mean  $\pm$  SE of triplicate trials from two independent experiments.
