# Supplementary material
Source: PubMed Central journal article supplement (PMC4187842)
Supplement: IAI.02141-14_zii999090850so3.pdf [file IAI.02141-14_zii999090850so3.pdf]

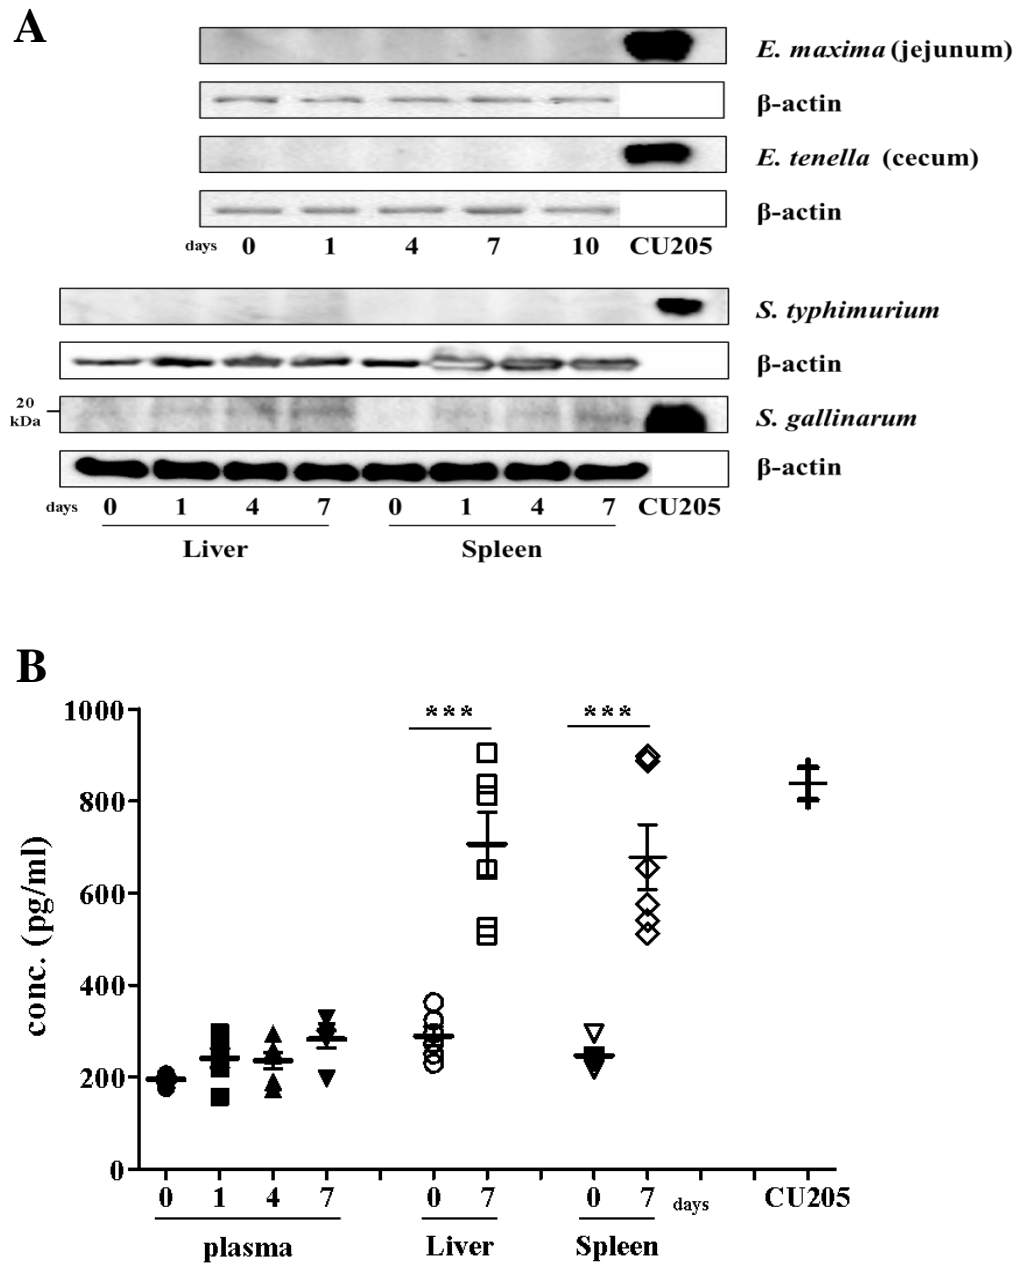

Figure S3. Analysis of chIL-17A in *Eimeria*- and *Salmonella*-infected chickens by Western blot analysis. (A) and Competitive ELISA (B). (A) Tissues from *Eimeria*- and *Salmonella*-infected chickens were collected at the indicated time points and homogenized. The homogenates were separated using SDS-PAGE and blotted with 1G8, a specific antibody for chIL-17A. (B) Tissue samples and plasma were obtained at the indicated time points after *S. gallinarum* infection and analyzed with chIL-17 ELISA kit (Cusabio Biotech, China) (n = 6). The CU205 supernatant was used as a positive control. \*\*\*  $P < 0.05$  was considered statistically significant compared to uninfected control.
